# Supplementary material for: Risk of Acquired Cholesteatoma and External Auditory Canal Stenosis in Traumatic Brain Injury: A Nationwide Population-Based Cohort Study
Source: PubMed Central journal article supplement (PMC7558982; doi:10.3390/ijerph17186624), 2020-09-11
Supplement: ijerph-17-06624-s001.pdf [file ijerph-17-06624-s001.pdf]

**Table S1.** Characteristics of study in the baseline.

| Brain Injury Variables       | Total         |       | With          |       | Without       |       | <i>p</i> |
|------------------------------|---------------|-------|---------------|-------|---------------|-------|----------|
|                              | <i>n</i>      | %     | <i>n</i>      | %     | <i>n</i>      | %     |          |
| Total                        | 1,367,502     |       | 455,834       | 33.33 | 911,668       | 66.67 |          |
| Gender                       |               |       |               |       |               |       | 0.999    |
| Male                         | 811,257       | 59.32 | 270,419       | 59.32 | 540,838       | 59.32 |          |
| Female                       | 556,245       | 40.68 | 185,415       | 40.68 | 370,830       | 40.68 |          |
| Age (years) (mean ± SD)      | 41.65 ± 23.75 |       | 41.45 ± 21.79 |       | 41.75 ± 24.68 |       | 0.373    |
| Low-income                   |               |       |               |       |               |       | <0.001   |
| Without                      | 1,350,778     | 98.78 | 449,267       | 98.56 | 901,511       | 98.89 |          |
| With                         | 16,724        | 1.22  | 6,567         | 1.44  | 10,157        | 1.11  |          |
| Catastrophic illness         |               |       |               |       |               |       | <0.001   |
| Without                      | 1,271,995     | 93.02 | 431,689       | 94.70 | 840,306       | 92.17 |          |
| With                         | 95,507        | 6.98  | 24,145        | 5.30  | 71,362        | 7.83  |          |
| CCI (mean ± SD)              | 0.48 ± 1.43   |       | 0.14 ± 0.57   |       | 0.64 ± 1.68   |       | <0.001   |
| Cause of injury              |               |       |               |       |               |       | <0.001   |
| Traffic injuries             | 282,937       | 61.50 | 233,142       | 66.73 | 49,795        | 44.99 |          |
| Poisoning                    | 1,833         | 0.40  | 401           | 0.11  | 1,432         | 1.29  |          |
| Falls                        | 95,781        | 20.82 | 74,447        | 21.31 | 21,334        | 19.27 |          |
| Burns and fires              | 519           | 0.11  | 40            | 0.01  | 479           | 0.43  |          |
| Drowning                     | 122           | 0.03  | 24            | 0.01  | 98            | 0.09  |          |
| Suffocation                  | 636           | 0.14  | 24            | 0.01  | 612           | 0.55  |          |
| Crushing/ Cutting/ Piercing  | 27,002        | 5.87  | 13,773        | 3.94  | 13,229        | 11.95 |          |
| Other unintentional injuries | 22,822        | 4.96  | 5,963         | 1.71  | 16,859        | 15.23 |          |
| Suicide                      | 2,055         | 0.45  | 248           | 0.07  | 1,807         | 1.63  |          |
| Homicide/Abuse               | 25,162        | 5.47  | 20,872        | 5.97  | 4,290         | 3.88  |          |
| Intention unknown            | 1,174         | 0.26  | 422           | 0.12  | 752           | 0.68  |          |
| Intentionality of injury     |               |       |               |       |               |       | <0.001   |
| Unintentional injury         | 382,674       | 93.89 | 295,298       | 93.64 | 87,376        | 94.76 |          |
| Intentional injury           | 24,885        | 6.11  | 20,050        | 6.36  | 4,835         | 5.24  |          |

Supplementary Materials

|                                  |                       |       |                       |       |                       |       |        |
|----------------------------------|-----------------------|-------|-----------------------|-------|-----------------------|-------|--------|
| Urbanization level               |                       |       |                       |       |                       |       | <0.001 |
| High                             | 415,214               | 30.36 | 105,263               | 23.09 | 309,951               | 34.00 |        |
| Middle                           | 575,609               | 42.09 | 186,466               | 40.91 | 389,143               | 42.68 |        |
| Low                              | 376,679               | 27.55 | 164,105               | 36.00 | 212,574               | 23.32 |        |
| Level of care                    |                       |       |                       |       |                       |       | <0.001 |
| Hospital center                  | 392,964               | 28.74 | 95,251                | 20.90 | 297,713               | 32.66 |        |
| Regional hospital                | 511,542               | 37.41 | 194,044               | 42.57 | 317,498               | 34.83 |        |
| Local hospital                   | 462,996               | 33.86 | 166,539               | 36.54 | 296,457               | 32.52 |        |
| Surgery                          |                       |       |                       |       |                       |       | <0.001 |
| Without                          | 873,691               | 63.89 | 346,649               | 76.05 | 527,042               | 57.81 |        |
| With                             | 493,811               | 36.11 | 109,185               | 23.95 | 384,626               | 42.19 |        |
| Length of days (mean ± SD)       | 6.65 ± 8.85           |       | 6.83 ± 8.79           |       | 6.56 ± 8.88           |       | <0.001 |
| Medical costs (NT\$) (mean ± SD) | 35,567.90 ± 71,694.20 |       | 42,940.78 ± 91,911.65 |       | 31,811.46 ± 58,697.95 |       | <0.001 |

P-value (category variable: Chi-square/Fisher exact test, continuous variable: t-test); CCI = Charlson Comorbidity Index; Traffic injuries: ICD-9-CM E800-849; Poisoning: ICD-9-CM E850-E869; Falls: ICD-9-CM E880-E889; Burns and fires: ICD-9-CM E890-E899; Drowning: ICD-9-CM E910; Suffocation: ICD-9-CM E911-E915; Other unintentional injuries: E870-E879, E900-E909, E921-E949; Suicide: ICD-9-CM E950-E959; Homicide / Abuse: ICD-9-CM E960-E969; Intention unknown: ICD-9-CM E980-E989; Unintentional injury: ICD-9-CM E800-E949; Intentional injury: ICD-9-CM E950-E979, E990-E999. Some patients did not provide the information of cause and intentionality of injury.
